# Supplementary material for: Visiting Molecular Mimicry Once More: Pathogenicity, Virulence, and Autoimmunity
Source: MDPI journal article supplement (doi:10.3390/microorganisms11061472), 2023-06-01
Supplement: s1 [file s1]

Supplementary Material

**Table S1:** Number of similar proteins between humans and different organisms.

| Organism                | Total of proteins | Low stringency   |                  |                   | High stringency  |                  |                   |
|-------------------------|-------------------|------------------|------------------|-------------------|------------------|------------------|-------------------|
|                         |                   | E-value          |                  |                   |                  |                  |                   |
|                         |                   | 1 <sup>-10</sup> | 1 <sup>-50</sup> | 1 <sup>-100</sup> | 1 <sup>-10</sup> | 1 <sup>-50</sup> | 1 <sup>-100</sup> |
| <i>H. sapiens</i>       | 75,074            |                  |                  |                   |                  |                  |                   |
| Pathogenic organisms    |                   |                  |                  |                   |                  |                  |                   |
| <i>P. falciparum</i>    | 5,456             | 2769<br>(50.75)  | 955<br>(17.50)   | 322<br>(5.90)     | 103<br>(1.89)    | 81<br>(1.48)     | 41<br>(0.75)      |
| <i>E. histolytica</i>   | 7,959             | 3357<br>(42.18)  | 1170<br>(14.70)  | 399<br>(5.01)     | 35<br>(0.44)     | 32<br>(0.40)     | 19<br>(0.24)      |
| <i>G. intestinalis</i>  | 4,466             | 2209<br>(49.46)  | 685<br>(15.34)   | 172<br>(3.85)     | 17<br>(0.38)     | 15<br>(0.34)     | 11<br>(0.25)      |
| <i>T. gondii</i>        | 8,404             | 3311<br>(39.40)  | 1357<br>(16.15)  | 517<br>(6.15)     | 118<br>(1.40)    | 107<br>(1.27)    | 61<br>(0.73)      |
| <i>T. brucei brucei</i> | 8,587             | 3711<br>(43.22)  | 1386<br>(16.14)  | 469<br>(5.46)     | 72<br>(0.84)     | 70<br>(0.82)     | 47<br>(0.55)      |
| <i>T. cruzi</i>         | 19,242            | 3858<br>(20.05)  | 1426<br>(7.41)   | 499<br>(2.59)     | 75<br>(0.39)     | 73<br>(0.38)     | 48<br>(0.25)      |
| <i>C. neoformans</i>    | 6,743             | 4734<br>(70.21)  | 2091<br>(31.01)  | 835<br>(12.38)    | 179<br>(2.65)    | 136<br>(2.02)    | 79<br>(1.17)      |
| <i>B. malayi</i>        | 9,409             | 7828<br>(83.2)   | 4296<br>(45.66)  | 1815<br>(19.29)   | 318<br>(3.38)    | 285<br>(3.03)    | 147<br>(1.56)     |
| <i>L. major</i>         | 8,038             | 3627<br>(45.12)  | 1360<br>(16.92)  | 451<br>(5.61)     | 72<br>(0.90)     | 70<br>(0.87)     | 45<br>(0.56)      |
| <i>C. tetani</i>        | 2,415             | 1115<br>(46.17)  | 278<br>(11.51)   | 68<br>(2.82)      | 0<br>(0)         | 0<br>(0)         | 0<br>(0)          |
| <i>C. botulinum</i>     | 3,590             | 1220<br>(33.98)  | 320<br>(8.91)    | 78<br>(2.17)      | 0<br>(0)         | 0<br>(0)         | 0<br>(0)          |
| <i>C. perfringens</i>   | 2,721             | 1116<br>(41.01)  | 302<br>(11.10)   | 83<br>(3.05)      | 0<br>(0)         | 0<br>(0)         | 0<br>(0)          |
| <i>N. meningitidis</i>  | 2,001             | 837<br>(41.83)   | 264<br>(13.19)   | 74<br>(3.70)      | 0<br>(0)         | 0<br>(0)         | 0<br>(0)          |
| <i>N. gonorrhoeae</i>   | 2,106             | 794<br>(37.70)   | 241<br>(11.44)   | 71<br>(3.37)      | 0<br>(0)         | 0<br>(0)         | 0<br>(0)          |
| <i>C. albicans</i>      | 6,035             | 4322<br>(71.62)  | 1881<br>(31.17)  | 707<br>(11.71)    | 161<br>(2.67)    | 118<br>(1.96)    | 70<br>(1.16)      |
| <i>C. glabrata</i>      | 5,200             | 4060<br>(78.08)  | 1740<br>(33.46)  | 669<br>(12.87)    | 135<br>(2.60)    | 96<br>(1.85)     | 59<br>(1.13)      |
| <i>C. tropicalis</i>    | 6,226             | 4157<br>(66.77)  | 1794<br>(28.81)  | 682<br>(10.95)    | 132<br>(2.12)    | 98<br>(1.57)     | 58<br>(0.93)      |
| <i>T. vaginalis</i>     | 50,190            | 3922<br>(7.81)   | 1144<br>(2.28)   | 355<br>(0.71)     | 63<br>(0.13)     | 42<br>(0.08)     | 32<br>(0.06)      |

|                           |        |                  |                  |                  |                  |                  |                  |
|---------------------------|--------|------------------|------------------|------------------|------------------|------------------|------------------|
| <i>S. liquefaciens</i>    | 5,531  | 1299<br>(23.49)  | 389<br>(7.03)    | 124<br>(2.24)    | 2<br>(0.04)      | 1<br>(0.02)      | 1<br>(0.02)      |
| <i>S. odoriferae</i>      | 5,121  | 1284<br>(25.07)  | 385<br>(7.52)    | 116<br>(2.27)    | 2<br>(0.04)      | 1<br>(0.02)      | 1<br>(0.02)      |
| <i>S. ficaria</i>         | 4,652  | 1273<br>(27.36)  | 387<br>(8.32)    | 125<br>(2.69)    | 2<br>(0.04)      | 1<br>(0.02)      | 1<br>(0.02)      |
| <i>B. cereus</i>          | 5,240  | 1487<br>(28.38)  | 392<br>(7.48)    | 109<br>(2.08)    | 0<br>(0)         | 0<br>(0)         | 0<br>(0)         |
| <i>B. subtilis</i>        | 4,260  | 1429<br>(33.54)  | 401<br>(9.41)    | 104<br>(2.44)    | 0<br>(0)         | 0<br>(0)         | 0<br>(0)         |
| <i>B. licheniformis</i>   | 4,164  | 1478<br>(35.49)  | 401<br>(9.63)    | 109<br>(2.62)    | 0<br>(0)         | 0<br>(0)         | 0<br>(0)         |
| <i>T. marneffei</i>       | 10,448 | 4901<br>(46.91)  | 2192<br>(20.98)  | 895<br>(8.57)    | 154<br>(1.47)    | 128<br>(1.23)    | 68<br>(0.65)     |
| Nonpathogenic organisms   |        |                  |                  |                  |                  |                  |                  |
| <i>T. rubripes</i>        | 51,078 | 16470<br>(32.24) | 13161<br>(25.77) | 9442<br>(18.49)  | 3843<br>(7.52)   | 3686<br>(7.22)   | 3063<br>(6.00)   |
| <i>A. thaliana</i>        | 39,351 | 6000<br>(15.25)  | 2632<br>(6.69)   | 1024<br>(2.60)   | 205<br>(0.52)    | 155<br>(0.39)    | 89<br>(0.23)     |
| <i>C. elegans</i>         | 26,714 | 9551<br>(35.75)  | 5242<br>(19.62)  | 2227<br>(8.34)   | 364<br>(1.36)    | 323<br>(1.21)    | 165<br>(0.62)    |
| <i>C. intestinalis</i>    | 17,309 | 11562<br>(66.80) | 7672<br>(44.32)  | 3834<br>(22.15)  | 673<br>(3.89)    | 607<br>(3.51)    | 383<br>(2.21)    |
| <i>D. melanogaster</i>    | 22,049 | 10125<br>(45.92) | 6523<br>(29.58)  | 3302<br>(14.98)  | 625<br>(2.83)    | 544<br>(2.47)    | 332<br>(1.51)    |
| <i>M. musculus</i>        | 55,471 | 19259<br>(34.72) | 17700<br>(31.91) | 15110<br>(27.24) | 15216<br>(27.43) | 14683<br>(26.47) | 13128<br>(26.67) |
| <i>O. sativa</i>          | 48,903 | 5943<br>(12.15)  | 2471<br>(5.05)   | 931<br>(1.90)    | 196<br>(0.40)    | 156<br>(0.32)    | 88<br>(0.18)     |
| <i>R. norvegicus</i>      | 29,943 | 19029<br>(63.55) | 17491<br>(58.41) | 14834<br>(49.54) | 14617<br>(48.82) | 14131<br>(47.19) | 12603<br>(42.09) |
| <i>S. cerevisiae</i>      | 6,049  | 4088<br>(67.58)  | 1770<br>(29.26)  | 698<br>(11.54)   | 135<br>(2.23)    | 96<br>(1.59)     | 60<br>(0.99)     |
| <i>S. castellii</i>       | 5,565  | 4038<br>(72.56)  | 1732<br>(31.12)  | 673<br>(12.09)   | 128<br>(2.30)    | 90<br>(1.62)     | 53<br>(0.95)     |
| <i>C. tyrobutyricum</i>   | 3,032  | 1154<br>(38.06)  | 297<br>(9.80)    | 77<br>(2.54)     | 0<br>(0)         | 0<br>(0)         | 0<br>(0)         |
| <i>C. acetobutylicum</i>  | 3,847  | 1163<br>(30.23)  | 309<br>(8.03)    | 75<br>(1.95)     | 0<br>(0)         | 0<br>(0)         | 0<br>(0)         |
| <i>C. chromiireducens</i> | 4,771  | 1282<br>(26.87)  | 317<br>(6.64)    | 90<br>(1.89)     | 1<br>(0.02)      | 1<br>(0.02)      | 1<br>(0.02)      |
| <i>N. sicca</i>           | 3646   | 951<br>(26.08)   | 267<br>(7.32)    | 75<br>(2.06)     | 1<br>(0.03)      | 1<br>(0.03)      | 0<br>(0)         |
| <i>N. elongata</i>        | 2073   | 835<br>(40.28)   | 266<br>(12.83)   | 75<br>(3.62)     | 0<br>(0)         | 0<br>(0)         | 0<br>(0)         |
| <i>N. bacilliformis</i>   | 2,966  | 851<br>(28.69)   | 249<br>(8.40)    | 70<br>(2.36)     | 1<br>(0.03)      | 0<br>(0)         | 0<br>(0)         |

|                        |        |                 |                 |               |               |               |              |
|------------------------|--------|-----------------|-----------------|---------------|---------------|---------------|--------------|
| <i>E. invadens</i>     | 9,857  | 2967<br>(30.10) | 984<br>(9.98)   | 322<br>(3.27) | 23<br>(0.23)  | 22<br>(0.22)  | 14<br>(0.14) |
| <i>S. symbiotica</i>   | 2,157  | 771<br>(35.74)  | 231<br>(10.71)  | 69<br>(3.20)  | 2<br>(0.09)   | 1<br>(0.05)   | 1<br>(0.05)  |
| <i>B. pseudofirmus</i> | 4,310  | 1330<br>(30.86) | 385<br>(8.93)   | 106<br>(2.46) | 0<br>(0)      | 0<br>(0)      | 0<br>(0)     |
| <i>P. roqueforti</i>   | 12,315 | 5015<br>(40.72) | 2167<br>(17.60) | 868<br>(7.05) | 169<br>(1.37) | 142<br>(1.15) | 69<br>(0.56) |
| <i>B. fuckeliana</i>   | 11,022 | 4986<br>(45.24) | 2201<br>(19.97) | 894<br>(8.11) | 163<br>(1.48) | 150<br>(1.36) | 75<br>(0.68) |

Low stringency = minimum percent coverage of 30% and minimum percent identity of 10%; High stringency = minimum percent coverage of 70% and minimum percent identity of 70%. () = Percentage of similar proteins to the human proteome calculated from the count of similar hits in relation to the total number of proteins of each species.

**Table S2:** Percentage of similar proteins between mice and different pathogenic organisms

| Organism             | Total of proteins | Pathogenic potential   | Low stringency   |                  |                   | High stringency  |                  |                   |
|----------------------|-------------------|------------------------|------------------|------------------|-------------------|------------------|------------------|-------------------|
|                      |                   |                        | E-value          |                  |                   |                  |                  |                   |
|                      |                   |                        | 1 <sup>-10</sup> | 1 <sup>-50</sup> | 1 <sup>-100</sup> | 1 <sup>-10</sup> | 1 <sup>-50</sup> | 1 <sup>-100</sup> |
| <i>M. musculus</i>   | 55,471            |                        |                  |                  |                   |                  |                  |                   |
| <i>F. tularensis</i> | 1,528             | 1.6 × 10 <sup>0</sup>  | 59.55<br>(910)   | 17.08<br>(261)   | 4.91<br>(75)      | 0.00<br>(0)      | 0.00<br>(0)      | 0.00<br>(0)       |
| <i>B. anthracis</i>  | 5,493             | 1.2 × 10 <sup>0</sup>  | 28.02<br>(1539)  | 7.37<br>(405)    | 2.09<br>(115)     | 0.00<br>(0)      | 0.00<br>(0)      | 0.00<br>(0)       |
| <i>B. suis</i>       | 1,091             | 8.3 × 10 <sup>-1</sup> | 38.41<br>(419)   | 8.89<br>(97)     | 2.11<br>(23)      | 0.18<br>(2)      | 0.18<br>(2)      | 0.09<br>(1)       |
| <i>T. gondii</i>     | 8,404             | 2.1 × 10 <sup>-1</sup> | 40.04<br>(3365)  | 16.54<br>(1390)  | 6.16<br>(518)     | 1.50<br>(126)    | 1.36<br>(114)    | 0.69<br>(58)      |
| <i>C. immitis</i>    | 9,712             | 1.9 × 10 <sup>-1</sup> | 50.85<br>(4939)  | 22.21<br>(2157)  | 9.12<br>(886)     | 2.00<br>(886)    | 1.54<br>(194)    | 0.70<br>(68)      |
| <i>K. pneumoniae</i> | 5,728             | 1.7 × 10 <sup>-1</sup> | 22.64<br>(1297)  | 6.72<br>(385)    | 2.09<br>(120)     | 0.03<br>(2)      | 0.03<br>(2)      | 0.02<br>(1)       |
| <i>S. pneumoniae</i> | 2,030             | 1.1 × 10 <sup>-1</sup> | 49.51<br>(1005)  | 13.99<br>(284)   | 2.91<br>(59)      | 0.00<br>(0)      | 0.00<br>(0)      | 0.00<br>(0)       |
| <i>Y. pestis</i>     | 3,909             | 8.5 × 10 <sup>-2</sup> | 28.27<br>(1105)  | 9.24<br>(361)    | 3.04<br>(119)     | 0.05<br>(2)      | 0.03<br>(1)      | 0.03<br>(1)       |
| <i>C. neoformans</i> | 6,743             | 6.2 × 10 <sup>-2</sup> | 70.64<br>(4763)  | 30.70<br>(2070)  | 12.35<br>(833)    | 2.71<br>(183)    | 1.93<br>(130)    | 1.08<br>(73)      |
| <i>V. vulnificus</i> | 4,990             | 4.2 × 10 <sup>-2</sup> | 28.78<br>(1436)  | 7.68<br>(383)    | 2.40<br>(120)     | 0.02<br>(1)      | 0.00<br>(0)      | 0.00<br>(0)       |
| <i>E. coli</i> k12   | 4,448             | 3.2 × 10 <sup>-3</sup> | 27.92<br>(1242)  | 8.36<br>(372)    | 2.68<br>(119)     | 0.04<br>(2)      | 0.04<br>(2)      | 0.02<br>(1)       |
| <i>C. albicans</i>   | 6,035             | 4.8 × 10 <sup>-4</sup> | 72.41<br>(4370)  | 31.17<br>(1881)  | 11.53<br>(696)    | 2.55<br>(154)    | 1.81<br>(109)    | 1.03<br>(62)      |

|                                |        |                        |                 |                 |               |               |               |              |
|--------------------------------|--------|------------------------|-----------------|-----------------|---------------|---------------|---------------|--------------|
| <i>A. fumigatus</i>            | 9,647  | 3.0 x 10 <sup>-5</sup> | 52.24<br>(5040) | 22.69<br>(2189) | 9.43<br>(910) | 1.93<br>(186) | 1.67<br>(161) | 0.67<br>(65) |
| <i>S. agalactiae</i>           | 2,105  | 5.0 x 10 <sup>-5</sup> | 47.03<br>(990)  | 11.78<br>(248)  | 2.85<br>(60)  | 0.00<br>(0)   | 0.00<br>(0)   | 0.00<br>(0)  |
| <i>L. monocytogenes</i>        | 2,844  | 1.3 x 10 <sup>-5</sup> | 42.83<br>(1218) | 10.79<br>(307)  | 2.50<br>(71)  | 0.00<br>(0)   | 0.00<br>(0)   | 0.00<br>(0)  |
| <i>N. asteroides</i>           | 6,459  | 3.7 x 10 <sup>-6</sup> | 25.17<br>(1626) | 6.38<br>(412)   | 1.30<br>(84)  | 0.00<br>(0)   | 0.00<br>(0)   | 0.00<br>(0)  |
| <i>N. fowleri</i>              | 13,596 | 1.1 x 10 <sup>-6</sup> | 40.77<br>(5543) | 17.56<br>(2388) | 6.62<br>(900) | 0.75<br>(102) | 0.67<br>(91)  | 0.37<br>(50) |
| <i>B. cereus</i>               | 5,240  | 3.2 x 10 <sup>-7</sup> | 22.10<br>(1158) | 7.82<br>(410)   | 2.12<br>(111) | 0.00<br>(0)   | 0.00<br>(0)   | 0.00<br>(0)  |
| <i>S. saprophyticus</i>        | 2,404  | 1.2 x 10 <sup>-7</sup> | 47.80<br>(1149) | 12.56<br>(302)  | 2.91<br>(70)  | 0.00<br>(0)   | 0.00<br>(0)   | 0.00<br>(0)  |
| <i>P. aeruginosa</i>           | 5,564  | 6.3 x 10 <sup>-8</sup> | 25.93<br>(1443) | 7.98<br>(444)   | 2.57<br>(143) | 0.04<br>(2)   | 0.04<br>(2)   | 0.02<br>(1)  |
| <i>L. pneumophila</i>          | 2,930  | 4.7 x 10 <sup>-8</sup> | 39.18<br>(1148) | 12.73<br>(373)  | 3.89<br>(114) | 0.03<br>(1)   | 0.03<br>(1)   | 0.03<br>(1)  |
| <i>S. epidermidis</i>          | 2,492  | 5.3 x 10 <sup>-8</sup> | 46.47<br>(1158) | 11.88<br>(296)  | 2.89<br>(72)  | 0.00<br>(0)   | 0.00<br>(0)   | 0.00<br>(0)  |
| <i>S. aureus</i>               | 2,889  | 3.2 x 10 <sup>-8</sup> | 40.74<br>(1177) | 10.25<br>(296)  | 2.53<br>(73)  | 0.00<br>(0)   | 0.00<br>(0)   | 0.00<br>(0)  |
| <i>H. influenzae</i><br>type B | 1,704  | 1.6 x 10 <sup>-8</sup> | 49.35<br>(841)  | 16.20<br>(276)  | 5.05<br>(86)  | 0.06<br>(1)   | 0.06<br>(1)   | 0.00<br>(0)  |

The percentage of similar proteins to the mouse proteome was calculated from the count of similar hits in relation to the total number of proteins of each species. Low stringency = minimum percent coverage of 30% and minimum percent identity of 10%; High stringency = minimum percent coverage of 70% and minimum percent identity of 70%. () = number of proteins with at least one similar mouse protein
